# Supplementary material for: A Guide for applying a revised version of the PARIHS framework for implementation
Source: Springer Nature journal article supplement (doi:10.1186/1748-5908-6-99), 2011-08-30
Supplement: Additional file 3 [file 1748-5908-6-99-s3.pdf]

A Guide for applying a revised version of the PARIHS framework for implementation | Implementation Science | Full Text


xml version="1.0" encoding="UTF-8"?

Skip to main content

Advertisement

Search


- Explore journals
- Get published
- About BMC
- My account

Search all BMC articles

Search

Implementation Science

- Home
- About
- Articles
- Collections
- Submission Guidelines
- Submit manuscript

A *Guide* for applying a revised version of the PARIHS framework for implementation

Download PDF

Download ePub

Download PDF

Download ePub

- Methodology
- Open access
- Published: 30 August 2011

# A *Guide* for applying a revised version of the PARIHS framework for implementation

- Cheryl B Stetler1,2,
- Laura J Damschroder3,
- Christian D Helfrich4,5 &
- …
- Hildi J Hagedorn6,7

Show authors

*Implementation Science*
**volume 6**, Article number: 99 (2011)
Cite this article

- 69k Accesses
- 265 Citations
- 8 Altmetric
- Metrics details

## Abstract

### Background

Based on a critical synthesis of literature on use of the Promoting Action on Research Implementation in Health Services (PARIHS) framework, revisions and a companion *Guide* were developed by a group of researchers independent of the original PARIHS team. The purpose of the *Guide* is to enhance and optimize efforts of researchers using PARIHS in implementation trials and evaluations.

### Methods

Authors used a planned, structured process to organize and synthesize critiques, discussions, and potential recommendations for refinements of the PARIHS framework arising from a systematic review. Using a templated form, each author independently recorded key components for each reviewed paper; that is, study definitions, perceived strengths/limitations of PARIHS, other observations regarding key issues and recommendations regarding needed refinements. After reaching consensus on these key components, the authors summarized the information and developed the *Guide*.

### Results

A number of revisions, perceived as consistent with the PARIHS framework's general nature and intent, are proposed. The related *Guide* is composed of a set of reference tools, provided in Additional files. Its core content is built upon the basic elements of PARIHS and current implementation science.

### Conclusions

We invite researchers using PARIHS for targeted evidence-based practice (EBP) implementations with a strong task-orientation to use this *Guide* as a companion and to apply the revised framework prospectively and comprehensively. Researchers also are encouraged to evaluate its use relative to perceived strengths and issues. Such evaluations and critical reflections regarding PARIHS and our *Guide* could thereby promote the framework's continued evolution.

Peer Review reports

## Background

In October 2010, a critical synthesis of literature on the use of the Promoting Action on Research Implementation in Health Services (PARIHS) framework was published in *Implementation Science*[1]. PARIHS is a widely cited conceptual framework that conceives of three key, interacting elements that influence successful implementation of evidence-based practices (EBPs): *Evidence* (*E*), *Context* (*C*), and *Facilitation* (*F*). The literature synthesis identified key strengths and issues as regards the framework.

A subgroup of the synthesis authors drew upon the above results to revise PARIHS for use by researchers in the Veteran's Health Administration (VA); that is, in trials or evaluations focused on implementation of targeted EBPs. A companion document, or *Guide*, also was developed to provide direction on how this revised version could be operationalized. Together, the framework modifications and *Guide* addressed barriers to the use of PARIHS previously encountered by VA researchers, in part due to the framework's limitations [1]. It is important to note that although we propose a number of revisions and comment on how best to use PARIHS, we have built on the original work of the PARIHS team [2–5]; and while we have shared our work with members of that team, this version of PARIHS and our related *Guide* were developed independently. It does not necessarily reflect the PARIHS team's views. This work further reflects our efforts to operationalize the PARIHS framework based on our VA research context, our VA experience with PARIHS, and our critical review [1]. Were others to follow the same process, they might come to different interpretations and conclusions.

Our *Guide* is intended to enhance and optimize the efforts of those choosing to use PARIHS as their theoretical framework. It is designed to enable users to more clearly and consistently define and apply relevant terms. Further, it is designed to facilitate diagnostic analysis of framework elements, selection of an appropriate implementation strategy, and measurement of *Successful Implementation*. It is hoped that similar syntheses and guides will be developed for other implementation theories, models, and frameworks [6]. Within the VA, where no single theory takes precedence over any other, efforts are underway to enhance operationalization of other frameworks and models by mapping their elements to constructs identified through a Consolidated Framework for Implementation Research (CFIR)[7].

Since the intent of this paper is to provide others interested in using PARIHS with tool-based, practical guidance, we rely heavily on additional files. These files equip users of the framework with the following: a set of definitions for elements/sub-elements, tips in the form of observations about use of elements/sub-elements, and a set of questions for diagnostic analysis and planning. All of the separate components of the actual *Guide* are contained in additional files (see Additional Files 1, 2, 3 and 4). The main narrative provides only overview information and pointers regarding various *Guide* components. Specifically, this overview briefly describes the basic underlying PARIHS framework [2–5], its limitations and related issues [1], the structured process and frames of reference used to identify modifications and create the *Guide*, and the revisions to the original framework [2–5]. It also provides sample material from additional files to give readers a better feel for their content and potential usefulness.

### Brief overview of PARIHS

PARIHS can be characterized as an *impact or explanatory* framework [6], originally developed in 1998 [8] and refined over time based on concept analyses and exploratory research [2–5, 9, 10].

Before using our *Guide*, it is important that users be familiar with the underlying framework of PARIHS [2, 3, 5] (*e.g*., see Rycroft-Malone *et al*. [3] for a recent depiction of the framework, including its key sub-elements and explanatory material; also see Kitson *et al*.'s discussion regarding theoretical issues in general and PARIHS' status specifically, noting the potential diagnostic and evaluative questions they provide in a related appendix [5]). Another, more recent publication provides an overview of the framework, its underlying assumptions, developmental work, and its use by others [11]. Key aspects of the PARIHS framework are herein summarized in Table 1. Figure 1 outlines the sub-elements of each of the core elements, as described in the PARIHS team's 2004 refinement [3].

**Table 1 Description of the underlying PARIHS framework [2–5]**

Full size table

**Figure 1**

**Key elements for implementing evidence into practice** [3]. This figure reproduces the PARIHS team's 2004 version of its framework, with all its elements and sub-elements and "criteria," from the following publication: Rycroft-Malone J, Harvey G, Seers K, Kitson A, McCormack B, Titchen A: An exploration of the factors that influence the implementation of evidence into practice. *J Clin Nurs*, 2004, **13**(8): 913-924. It is reproduced with permission. "Criteria" highlight the conditions more likely needed for, or critical to, successful implementation.

Full size image

In summary, PARIHS can be selected as a broad framework to guide development of a program of implementation interventions that effectively enable EBP-related changes. Specifically, it can be used to diagnose critical elements related to implementation of an EBP (*E* and *C*) and thence development of an implementation strategy (*F*) to enable successful and sustained change. A PARIHS-based diagnostic analysis can additionally engage stakeholders in self-reflection regarding critical aspects of implementation and the related nature of needed change [12].

### PARIHS limitations and related issues

Strengths of the PARIHS framework identified through our published synthesis included the following: its intuitive appeal, provision of a basic "to-do" list, flexibility in application, and inclusion of *Successful Implementation* as the desired outcome [1]. Of particular importance to development of the *Guide* were its identified limitations and related issues [1]. These included the following, which are further described in Table 2:

**Table 2 Limitations of and related issues with the underlying PARIHS framework [1]**

Full size table

- Lack of conceptual clarity, specificity, and transparency, which results in different interpretations of PARIHS concepts by different researchers
- Lack of inclusion of relevant elements perceived to be critical to implementation and congruent with the main intent of PARIHS
- Lack of well-developed instrumentation and evaluation measures, as well as limited evaluation of actual use or perceived usefulness of the framework.

No published studies were identified that used the framework comprehensively and prospectively to develop an implementation project. The ability to fully evaluate its usefulness thus has been limited.

## Methods

### Revising PARIHS for use in task-oriented implementation

Our objective in developing the *Guide* was to meet the needs of VA researchers interested in understanding the nuts and bolts of operationalizing PARIHS. More specifically, our objective was two-fold: (1) provide guidance on *how best to apply/operationalize the framework within QUERI's* [Quality Enhancement Research Initiative] *action-oriented approach*[13–15] and (2) enable more effective use of the framework by addressing identified barriers (Table 2). (Note: *Italicized* sentences here and in the next section come from our internal PARIHS synthesis/application project plan.)

Given this practical need, after completion of the synthesis groundwork, the authors used a planned, structured process to *organize and bring together into a coherent whole the substance of our critiques, related discussions, and potential recommendations for refinements/adaptations* of the PARIHS framework--*for use within the context of QUERI-like implementation projects*. Specifically, the authors did the following:

1. 1)

   Utilizing finalized critiques from the published synthesis [1], each author independently recorded key components for each reviewed paper on a templated form. This form focused on the study's definition of elements, perceived strengths/limitations of PARIHS highlighted by the study, other observations regarding key PARIHS issues, and recommendations regarding *refinements consistent with the intent of the basic framework ... in light of the QUERI framework, QUERI experience and current science*.
2. 2)

   Each author independently reviewed selected components of two other published syntheses that analyzed the concept of *Context* [7, 16].
3. 3)

   As a group, the authors critically reviewed, discussed, and themed the above information at a two-day intensive face-to-face meeting.)
4. 4)

   As a group, the authors reached consensus on the above key components, including the clarity/lack of clarity of language found in various definitions, and then identified opportunities to improve the framework.

Information from step 4 was used to draft a *Guide*. Critical to this draft was the original PARIHS framework, primarily its two most recent versions [2, 3] and the 2008 paper and Appendix [5]. Feedback was obtained from VA implementation researchers [1] and others familiar with PARIHS, and minor refinements made.

Critical to understanding the general implementation approach embedded within this *Guide* is the nature of QUERI's action-oriented paradigm. This implementation/research paradigm served as an implicit background or frame of reference for overall author deliberations. It distinguishes two general types of implementation situations and emphasizes a set of innovative concepts.

#### Types of implementation

We distinguish two general types of implementation situations:

- one with a *task-oriented* purpose, where a specific intervention is being implemented within a relatively short timeframe (such as implementing a new procedure or care process)
- one with a broader *"organizational"* purpose, where implementation strategies are targeted at transformational change within one or more levels of an institution (such as changing culture to be more receptive to using EBPs on a routine basis [17]).

The primary focus of QUERI projects, and thus the purpose of this *Guide*, is to assist with more short-term, targeted EBP implementation studies with a strong task orientation [14, 15]. We highlight this distinction because it influenced how we approached framework refinements and identified observations/tips in the reference tools.

In short-term, task-oriented situations, implementation efforts are unlikely to target broad changes in the multiple sub-elements related to culture, evaluation, or leadership. We therefore focused on defining and highlighting only those aspects of PARIHS elements that might realistically be modified in a relatively short period of time.

It is important to further distinguish our use of the terms *task* versus *organizational* purpose from the PARIHS framework's approach to *Facilitation*. The latter envisages the *purpose* of *Facilitation* to occur along a continuum from primarily "task" to "holistic." The former focuses on "a 'doing for others' role ... [and is] more discrete, practical, technical and task driven," while the latter focuses on "an 'enabling and empowering' role which is more developmental" [5]. In most cases, task-oriented EBP implementation situations will rely more heavily on task-focused or "mixed" *Facilitation* methods; on the other hand, transformational initiatives that have an organizational redesign goal will rely more heavily on holistic *Facilitation*[5].

#### Innovative, action-oriented QUERI concepts

As QUERI developed over time, a set of concepts guided its implementation research activities. Some of these concepts relate to QUERI innovations or contributions [7, 14, 15, 17–24], others to the Stetler model of EBP [25, 26], and yet others to the general implementation science literature spanning the last decade [16, 27–33]. Such concepts include, for example, strength of evidence, theoretical underpinnings, attributes of innovations, appropriate variation and qualifiers for use of evidence, social marketing and other recognized implementation interventions, sustainability, cost considerations for implementation, and critical leadership behaviors. Such concepts were familiar to the authors, were implicitly part of our decision-making, and ultimately influenced our development of the *Guide's* content in general and construction of the files' "Related Observations/Tips" most specifically.

## Results

### Revisions to PARIHS

Based on the above process and frames of reference, a number of modifications were made to the original PARIHS framework. Emphasis was placed on modifiable sub-elements or ones that might be buffered to reduce negative influences. This revised version of PARIHS is outlined in Table 3. Of particular note are the following:

**Table 3 Revised PARIHS framework for a task-oriented approach to implementation: *SI* = function of *E, C, F***

Full size table

- Changes were made both to wording and ordering of a few elements/sub-elements, as can be seen in comparing Table 3 to Figure 1. For example, the name of the *Context* element was amended (*Contextual Readiness for Targeted EBP Implementation*) to clearly indicate our task-oriented focus; and *Leadership* became the first sub-element under *Context*, indicating its prime importance in implementation. Nonetheless, it is important to note that the original PARIHS sub-elements of transformational leadership are still reflected within the *Guide* (*e.g*., role clarity and effective teamwork).
- A few items were added to core elements to reflect relevant features critical to implementation but missing from the framework (Table 2); for example, *EBP Characteristics* within *Evidence* now highlights attributes of an implementable form of "evidence" (*i.e*., the full form of an "EBP" innovation, such as a policy, procedure, or program). These additions were drawn from Roger's diffusion of innovation work [33] and the CFIR [7]. Some of these additions were already implicit within other *Evidence* sub-elements. As a result there may appear to be some overlap. However, these attributes were considered important enough to be expanded and made explicit, thus ensuring their consideration. This is particularly important because implementation decisions flow first from the nature of the implementable form of the *Evidence* and its characteristics.

Additionally, for *Facilitation*, implementation interventions beyond that of a facilitator role were inserted. This modification speaks in part to the 2008 PARIHS paper's comment regarding development of a "programme of change," that is, "task based, planned change programme approaches that meet the individual and team's learning needs...." [5]--and, we would add, that meet contextual needs identified through diagnostic analysis. As these programmes of change are likely to require "a range of different techniques" [5], we now make such techniques more explicit. This ties "*Facilitation* as an intervention" [5] to implementation interventions in general, which facilitators and others employ to enhance adoption.

- *Successful Implementation* is now visualized as an explicit part of the revised PARIHS "figure" (Table 3), with detailed definitions provided in the *Guide* (Additional File 4). This first effort at explicating the meaning of *Successful Implementation* is only preliminary and will benefit from ongoing attempts to operationalize it.

Finally, based on our synthesis, our frames of reference, and our framework modifications, we were able to construct a *Guide* (Table 4). Again, its intent is to enhance and optimize efforts of those using PARIHS as their theoretical framework. Within the *Guide*, the team used active, pragmatic language for each element/sub-element--and, again, tied these changes to the original PARIHS framework material and its perceived intent. Such language focuses on recognizable, measurable behaviors and minimizes what to us was abstract language less familiar to our researchers. The content of all additional files provides the following:

**Table 4 Additional files: *Guide* for applying a revised version of the PARIHS framework for implementation**

Full size table

- Conceptual and operational definitions: This includes refined meanings of constructs within the framework, reflecting the team's interpretation of each element and related sub-element. These definitions are intended to facilitate in-depth understanding of each concept, guide application of the various elements, and identify potential questions for diagnostic analysis and planning.
- Observations and tips: This additional information, from the implementation literature and authors' experiences, is designed to enhance researchers' nuanced understanding of PARIHS elements/sub-elements. Tips also may facilitate design decisions.

As stated previously, the material contained across the additional files (*i.e*., the revised PARIHS *Guide*) is the meat of this publication. It is intended to be used as an active reference tool for planning implementation research and evaluation. Tables 5, 6 and 7 provide the reader with a preview of these reference tools. Table 5 points out how we describe the potential use of an individual tool; Table 6 illustrates our approach to defining each of the core elements; and Table 7 demonstrates how an individual sub-element is presented in terms of its definitions, tips on use, and measurement.

**Table 5 Illustration of *Guide* content: description of potential uses of a sample tool**

Full size table

**Table 6 Illustration of *Guide* content: description of a core element**

Full size table

**Table 7 Illustration of *Guide* content: sample material for a sub-element**

Full size table

### Summary and conclusions

Based on a systematic, structured process, the authors have revised PARIHS and provided a detailed reference *Guide* to help researchers apply this framework. When using the *Guide*, readers should keep the following points in mind:

- The *Guide* relies on basic elements of PARIHS, as well as updates provided in Kitson and colleagues' 2008 paper and its appendix, specifically its diagnostic approach [5].
- A key revision objective was to minimize the original framework's limitations and related issues (Table 2).
- Our modifications are consistent with the general nature and intent of the PARIHS framework.
- Basic expectations for applying any framework, theory, or model were a guiding influence, that is, the need for clear conceptual and operational definitions, measurement approaches, and additional practical information about the realities of application.
- QUERI frames of reference and concepts affected development of *Guide* content, as did supplemental information from complementary theories such as Rogers, the Stetler model of EBP, and other selected concepts from implementation science. Modifications are thus responsive to the PARIHS team's suggestion [5] to draw on other theoretical perspectives; for example, "What theories would inform the way evidence has been conceptualized within the PARIHS framework?"
- The implementation knowledge and experience-based lessons of the author team (published implementation scientists in the VA) influenced consensual judgments underlying the *Guide*.
- Our addition of "other implementation interventions" to the *Facilitation* element draws, in part, from a QUERI evaluation on facilitation wherein data suggested the following: "external facilitators were likely to use or integrate other implementation interventions, while performing this problem-solving and supportive role" [19].

The *Guide* has been disseminated within the VA as a resource for implementation scientists. Individuals familiar to the authors (personal communications) have reported using the modified framework in their studies or intending to put it to use in the near future. Such uses included the following:

- Guiding new investigators looking for "theoretical" assistance
- Simplifying selection of diagnostic/evaluative questions relevant to a targeted EBP, followed by organization of those questions into a semi-structured interview
- Defining specifics of an external facilitation intervention (*e.g*., the level of interaction and type of external facilitator needed), thus making formative evaluation easier [20]
- Facilitating thinking about what *Successful Implementation* would look like in a study and how that would be measured
- Assisting in the preparation of a proposal wherein use of a theoretical framework and related design decisions could more clearly be explained to reviewers.

In conclusion, the PARIHS synthesis paper suggested that "the single greatest need for researchers using PARIHS, and other implementation models, is to use the framework prospectively and comprehensively, and evaluate that use relative to its perceived strengths and issues for enhancing successful implementation" [1]. Those using this manuscript to either implement a targeted EBP or study such an implementation thus are encouraged to use the *Guide* prospectively/comprehensively and to evaluate its use. Formal evaluations and critical reflections regarding the usefulness and limitations of our revised PARIHS and *Guide* could thereby promote continued evolution of this promising framework.

## References

1. Helfrich C, Damschroder L, Hagedorn H, Daggett G, Sahay A, Ritchie M, Damush T, Guihan M, Ullrich P, Stetler C: A critical synthesis of literature on the Promoting Action on Research Implementation in Health Services (PARIHS) framework. Implementation Science. 2010, 5 (1): 82-10.1186/1748-5908-5-82.

   Article 
   PubMed 
   PubMed Central 
   Google Scholar
2. Rycroft-Malone J, Kitson A, Harvey G, McCormack B, Seers K, Titchen A, Estabrooks C: Ingredients for change: revisiting a conceptual framework. Quality & Safety in Health Care. 2002, 11 (2): 174-180. 10.1136/qhc.11.2.174.

   Article 
   CAS 
   Google Scholar
3. Rycroft-Malone J, Harvey G, Seers K, Kitson A, McCormack B, Titchen A: An exploration of the factors that influence the implementation of evidence into practice. J Clin Nurs. 2004, 13 (8): 913-924. 10.1111/j.1365-2702.2004.01007.x.

   Article 
   PubMed 
   Google Scholar
4. Rycroft-Malone J, Seers K, Titchen A, Harvey G, Kitson A, McCormack B: What counts as evidence in evidence-based practice?. J Adv Nurs. 2004, 47 (1): 81-90. 10.1111/j.1365-2648.2004.03068.x.

   Article 
   PubMed 
   Google Scholar
5. Kitson A, Rycroft-Malone J, Harvey G, McCormack B, Seers K, Titchen A: Evaluating the successful implementation of evidence into practice using the PARiHS framework: theoretical and practical challenges. Implementation Science. 2008, 3 (1): 1-10.1186/1748-5908-3-1.

   Article 
   PubMed 
   PubMed Central 
   Google Scholar
6. Grol RPTM, Bosch MC, Hulscher MEJL, Eccles MP, Wensing M: Planning and Studying Improvement in Patient Care: The Use of Theoretical Perspectives. The Milbank Quarterly. 2007, 85 (1): 93-138. 10.1111/j.1468-0009.2007.00478.x.

   Article 
   PubMed 
   PubMed Central 
   Google Scholar
7. Damschroder LJ, Aron DC, Keith RE, Kirsh SR, Alexander JA, Lowery JC: Fostering implementation of health services research findings into practice: a consolidated framework for advancing implementation science. Implement Sci. 2009, 4: 50-10.1186/1748-5908-4-50.

   Article 
   PubMed 
   PubMed Central 
   Google Scholar
8. Kitson A, Harvey G, McCormack B: Enabling the implementation of evidence based practice: a conceptual framework. Quality in Health Care. 1998, 7 (3): 149-158. 10.1136/qshc.7.3.149.

   Article 
   CAS 
   PubMed 
   PubMed Central 
   Google Scholar
9. Harvey G, Loftus-Hills A, Rycroft-Malone J, Titchen A, Kitson A, McCormack B, Seers K: Getting evidence into practice: the role and function of facilitation. Journal of Advanced Nursing. 2002, 37 (6): 577-588. 10.1046/j.1365-2648.2002.02126.x.

   Article 
   PubMed 
   Google Scholar
10. McCormack B, Kitson A, Harvey G, Rycroft-Malone J, Titchen A, Seers K: Getting evidence into practice: the meaning of 'context'. J Adv Nurs. 2002, 38 (1): 94-104. 10.1046/j.1365-2648.2002.02150.x.

    Article 
    PubMed 
    Google Scholar
11. Rycroft-Malone J: Promoting Action on Research Implementation in Health Services (PARIHS). Models and Frameworks for Implementing Evidence-Based Practice: Linking Evidence to Action. Edited by: Rycroft-Malone J, Bucknall T. 2010, Oxford: Wiley-Blackwell

    Google Scholar
12. McCormack B, McCarthy G, Wright J, Coffey A: Development and Testing of the Context Assessment Index (CAI). Worldviews on Evidence-Based Nursing. 2009, 6 (1): 27-35. 10.1111/j.1741-6787.2008.00130.x.

    Article 
    PubMed 
    Google Scholar
13. Feussner JR, Kizer KW, Demakis JG: The Quality Enhancement Research Initiative (QUERI): from evidence to action. Med Care. 2000, 38 (6 Suppl 1): I1-6-

    PubMed 
    Google Scholar
14. Stetler CB, McQueen L, Demakis J, Mittman BS: An organizational framework and strategic implementation for system-level change to enhance research-based practice: QUERI Series. Implement Sci. 2008, 3: 30-10.1186/1748-5908-3-30.

    Article 
    PubMed 
    PubMed Central 
    Google Scholar
15. Stetler CB, Mittman BS, Francis J: Overview of the VA Quality Enhancement Research Initiative (QUERI) and QUERI theme articles: QUERI Series. Implement Sci. 2008, 3: 8-10.1186/1748-5908-3-8.

    Article 
    PubMed 
    PubMed Central 
    Google Scholar
16. Greenhalgh T, Robert G, Bate P, Kyriakidou O, Macfarlane F, Peacock R: How to Spread Good Ideas: A systematic review of the literature on diffusion, dissemination and sustainability of innovations in health service delivery and organisation. National Co-ordinating Centre for NHS Service Delivery and Organisation Research & Development (NCCSDO). 2004, 1-424.

    Google Scholar
17. Stetler C, Ritchie J, Rycroft-Malone J, Schultz A, Charns M: Institutionalizing evidence-based practice: an organizational case study using a model of strategic change. Implementation Science. 2009, 4 (1): 78-10.1186/1748-5908-4-78.

    Article 
    PubMed 
    PubMed Central 
    Google Scholar
18. Helfrich C, Li Y-F, Sharp N, Sales A: Organizational readiness to change assessment (ORCA): Development of an instrument based on the Promoting Action on Research in Health Services (PARIHS) framework. Implementation Science. 2009, 4 (1): 38-10.1186/1748-5908-4-38.

    Article 
    PubMed 
    PubMed Central 
    Google Scholar
19. Stetler C, Legro M, Rycroft-Malone J, Bowman C, Curran G, Guihan M, Hagedorn H, Pineros S, Wallace C: Role of "external facilitation" in implementation of research findings: a qualitative evaluation of facilitation experiences in the Veterans Health Administration. Implementation Science. 2006, 1 (1): 23-10.1186/1748-5908-1-23.

    Article 
    PubMed 
    PubMed Central 
    Google Scholar
20. Stetler CB, Legro MW, Wallace CM, Bowman C, Guihan M, Hagedorn H, Kimmel B, Sharp ND, Smith JL: The role of formative evaluation in implementation research and the QUERI experience. J Gen Intern Med. 2006, 21 (Suppl 2): S1-8.

    Article 
    PubMed 
    PubMed Central 
    Google Scholar
21. Hagedorn H, Hogan M, Smith JL, Bowman C, Curran GM, Espadas D, Kimmel B, Kochevar L, Legro MW, Sales AE: Lessons learned about implementing research evidence into clinical practice. Experiences from VA QUERI. J Gen Intern Med. 2006, 21 (Suppl 2): S21-4.

    PubMed 
    PubMed Central 
    Google Scholar
22. Smith MW, Barnett PG: The role of economics in the QUERI program: QUERI Series. Implement Sci. 2008, 3: 20-10.1186/1748-5908-3-20.

    Article 
    PubMed 
    PubMed Central 
    Google Scholar
23. Luck J, Hagigi F, Parker LE, Yano EM, Rubenstein LV, Kirchner JE: A social marketing approach to implementing evidence-based practice in VHA QUERI: the TIDES depression collaborative care model. Implement Sci. 2009, 4: 64-10.1186/1748-5908-4-64.

    Article 
    PubMed 
    PubMed Central 
    Google Scholar
24. Bowman CC, Sobo EJ, Asch SM, Gifford AL: Measuring persistence of implementation: QUERI Series. Implement Sci. 2008, 3: 21-10.1186/1748-5908-3-21.

    Article 
    PubMed 
    PubMed Central 
    Google Scholar
25. Stetler CB: Refinement of the Stetler/Marram model for application of research findings to practice. Nurs Outlook. 1994, 42 (1): 15-25. 10.1016/0029-6554(94)90067-1.

    Article 
    CAS 
    PubMed 
    Google Scholar
26. Stetler CB: Updating the Stetler Model of research utilization to facilitate evidence-based practice. Nurs Outlook. 2001, 49 (6): 272-9. 10.1067/mno.2001.120517.

    Article 
    CAS 
    PubMed 
    Google Scholar
27. Stetler CB, Corrigan B, Sander-Buscemi K, Burns M: Integration of evidence into practice and the change process: fall prevention program as a model. Outcomes Manag Nurs Pract. 1999, 3 (3): 102-11.

    CAS 
    PubMed 
    Google Scholar
28. Lohr KN, Carey TS: Assessing "best evidence": issues in grading the quality of studies for systematic reviews. Jt Comm J Qual Improv. 1999, 25 (9): 470-9.

    CAS 
    PubMed 
    Google Scholar
29. Rogers E: Diffusion of Innovations. 1983, New York: Free Press

    Google Scholar
30. Grimshaw J, Thomas R, MacLennan G, Fraser C, Ramsay C, Vale L, Whitty P, Eccles M, Matowe L, Shirran L, Wensing M, Dijkstra R, Donaldson C: Effectiveness and efficiency of guideline dissemination and implementation strategies. Health Technol Assess. 2004, 8 (6): iii-iv, 1-72.

    Article 
    CAS 
    PubMed 
    Google Scholar
31. Grol R, Wensing M, Eccles M: The implementation of change in clinical practice. 2005, Edinburgh: Elsevier Butterworth Heinemann

    Google Scholar
32. NHS Centre for Reviews and Dissemination: Getting evidence into practice. Effective Health Care. 1999, 5 (1): 1-16. [http://www.york.ac.uk/inst/crd/EHC/ehc51.pdf]

    Google Scholar
33. Rogers EM: Diffusion of Innovations. 1995, New York, NY: The Free Press

    Google Scholar
34. Ellis I, Howard P, Larson A, Robertson J: From workshop to work practice: An exploration of context and facilitation in the development of evidence-based practice. Worldviews Evid Based Nurs. 2005, 2 (2): 84-93. 10.1111/j.1741-6787.2005.04088.x.

    Article 
    PubMed 
    Google Scholar
35. Bahtsevani C, Willman A, Khalaf A, Östman M: Developing an instrument for evaluating implementation of clinical practice guidelines: a test-retest study. Journal of Evaluation in Clinical Practice. 2008, 14 (5): 839-846.

    Article 
    PubMed 
    Google Scholar
36. Sharp ND, Pineros SL, Hsu C, Starks H, Sales AE: A Qualitative Study to Identify Barriers and Facilitators to Implementation of Pilot Interventions in the Veterans Health Administration (VHA) Northwest Network. Worldviews Evid Based Nurs. 2004, 1 (2): 129-39. 10.1111/j.1741-6787.2004.04023.x.

    Article 
    PubMed 
    Google Scholar
37. Helfrich CD, Weiner BJ, McKinney MM, Minasian L: Determinants of Implementation Effectiveness: Adapting a Framework for Complex Innovations. Med Care Res Rev. 2007, 64 (3): 279-303. 10.1177/1077558707299887.

    Article 
    PubMed 
    Google Scholar

Download references

## Acknowledgements

This material is based upon work supported by the U.S. Department of Veterans Affairs, Office of Research and Development Health Services R&D Program.

We wish to acknowledge Linda McIvor, Diane Hanks, Sarah Krein, and Jacqueline Fickel, as well as members of the original synthesis group [1], for their feedback and input regarding the *Guide*. We would also like to acknowledge the following individuals for their perceptions regarding the use and potential value of using the revised PARIHS *Guide*: Marylou Guihan, DiJon Fasoli, and Hildi Hagedorn.

The views expressed in this article are the authors' and do not necessarily reflect the position or policy of the Department of Veterans Affairs.

## Author information

### Authors and Affiliations

1. Independent Consultant, Amherst, Massachusetts, USA

   Cheryl B Stetler
2. Health Services Department, Boston University School of Public Health, Boston, Massachusetts, USA

   Cheryl B Stetler
3. HSR&D Center for Clinical Management Research and Diabetes QUERI, VA Ann Arbor Healthcare System, Ann Arbor, Michigan, USA

   Laura J Damschroder
4. Northwest HSR&D Center of Excellence, VA Puget Sound Healthcare System, Seattle, Washington, USA

   Christian D Helfrich
5. Department of Health Services, University of Washington School of Public Health, Seattle, Washington, USA

   Christian D Helfrich
6. VA Substance Use Disorders Quality Enhancement Research Initiative, Minneapolis VA Medical Center, Minneapolis, Minnesota, USA

   Hildi J Hagedorn
7. Department of Psychiatry, School of Medicine, University of Minnesota, Minneapolis, Minnesota, USA

   Hildi J Hagedorn

Authors

1. Cheryl B Stetler

   View author publications

   You can also search for this author in
   PubMed Google Scholar
2. Laura J Damschroder

   View author publications

   You can also search for this author in
   PubMed Google Scholar
3. Christian D Helfrich

   View author publications

   You can also search for this author in
   PubMed Google Scholar
4. Hildi J Hagedorn

   View author publications

   You can also search for this author in
   PubMed Google Scholar

### Corresponding author

Correspondence to
Cheryl B Stetler.

## Additional information

### Competing interests

The authors declare that they have no competing interests.

### Authors' contributions

CBS conceived the design of a *Guide* and drafted both the initial manuscript and *Guide*. All authors contributed to development of its content, reviewed drafts, and provided major input and revisions. All authors approved the final manuscript.

## Electronic supplementary material

### 13012\_2010\_416\_MOESM1\_ESM.PDF

Additional File 1: **EVIDENCE REFERENCE TOOL: Definitions for a "Revised"** ***EVIDENCE*** **Element:** ***EVIDENCE & EBP CHARACTERISTICS***. This *Evidence* Reference Tool provides explicit definitions for this element and its sub-elements; related, detailed explanations and observations; and sample, optional questions to guide formative evaluation. (PDF 80 KB)

### 13012\_2010\_416\_MOESM2\_ESM.PDF

Additional File 2: **CONTEXT REFERENCE TOOL: Definitions for a "Revised" PARIHS "** ***Context*** **" Element:** ***Contextual Readiness for Targeted EBP Implementation***. This *Context* Reference Tool provides explicit definitions for this element and its sub-elements; related, detailed explanations and observations; and sample, optional questions to guide formative evaluation. (PDF 79 KB)

### 13012\_2010\_416\_MOESM3\_ESM.PDF

Additional File 3: FACILITATION REFERENCE TOOL: Definitions for a "Revised" PARIHS *FACILITATION* Element. This Facilitation Reference Tool provides explicit definitions for this element and its sub-elements; related, detailed explanations and observations; and sample, optional questions to guide planning the critical details of implementation. (PDF 83 KB)

### 13012\_2010\_416\_MOESM4\_ESM.PDF

Additional File 4: SUCCESSFUL IMPLEMENTATION TOOL: Definitions for a "Revised" PARIHS *Successful Implementation* Element. This Successful Implementation Reference Tool provides information on three foci for evaluation of this component of the framework; related definitions and key issues; and observations and suggestions regarding relevant measurements. (PDF 60 KB)

## Authors’ original submitted files for images

Below are the links to the authors’ original submitted files for images.

### Authors’ original file for figure 1

## Rights and permissions

This article is published under license to BioMed Central Ltd. This is an Open Access article distributed under the terms of the Creative Commons Attribution License (http://creativecommons.org/licenses/by/2.0), which permits unrestricted use, distribution, and reproduction in any medium, provided the original work is properly cited.

Reprints and permissions

## About this article

### Cite this article

Stetler, C.B., Damschroder, L.J., Helfrich, C.D. *et al.* A *Guide* for applying a revised version of the PARIHS framework for implementation.
*Implementation Sci* **6**, 99 (2011). https://doi.org/10.1186/1748-5908-6-99

Download citation

- Received: 22 November 2010
- Accepted: 30 August 2011
- Published: 30 August 2011
- DOI: https://doi.org/10.1186/1748-5908-6-99

### Share this article

Anyone you share the following link with will be able to read this content:

Get shareable link

Sorry, a shareable link is not currently available for this article.

Copy to clipboard

Provided by the Springer Nature SharedIt content-sharing initiative

### Keywords

- Transformational Leadership
- Implementation Intervention
- Diagnostic Analysis
- Reference Tool
- External Facilitator

Download PDF

Download ePub

Advertisement

#### Implementation Science

ISSN: 1748-5908

#### Contact us

- Submission enquiries: Access here and click Contact Us
- General enquiries: info@biomedcentral.com

- Read more on our blogs
- Receive BMC newsletters
- Manage article alerts
- Language editing for authors
- Scientific editing for authors

- Policies
- Accessibility
- Press center

- Support and Contact
- Leave feedback
- Careers

### Follow BMC

- BMC Twitter page
- BMC Facebook page
- BMC Weibo page

By using this website, you agree to our
Terms and Conditions,
Your US state privacy rights,
Privacy
statement and
Cookies policy.
Your privacy choices/Manage cookies we use in the preference centre.

© 2024 BioMed Central Ltd unless otherwise stated. Part of
Springer Nature.

xml version="1.0" encoding="UTF-8"?
